# Supplementary material for: Identification and Characterization of Nucleolin as a COUP-TFII Coactivator of Retinoic Acid Receptor β Transcription in Breast Cancer Cells
Source: PLOS journal article supplement (doi:10.1371/journal.pone.0038278), 2012-05-31
Supplement: S5 (10.1371/journal.pone.0038278.s005) [file journal.pone.0038278.s005]

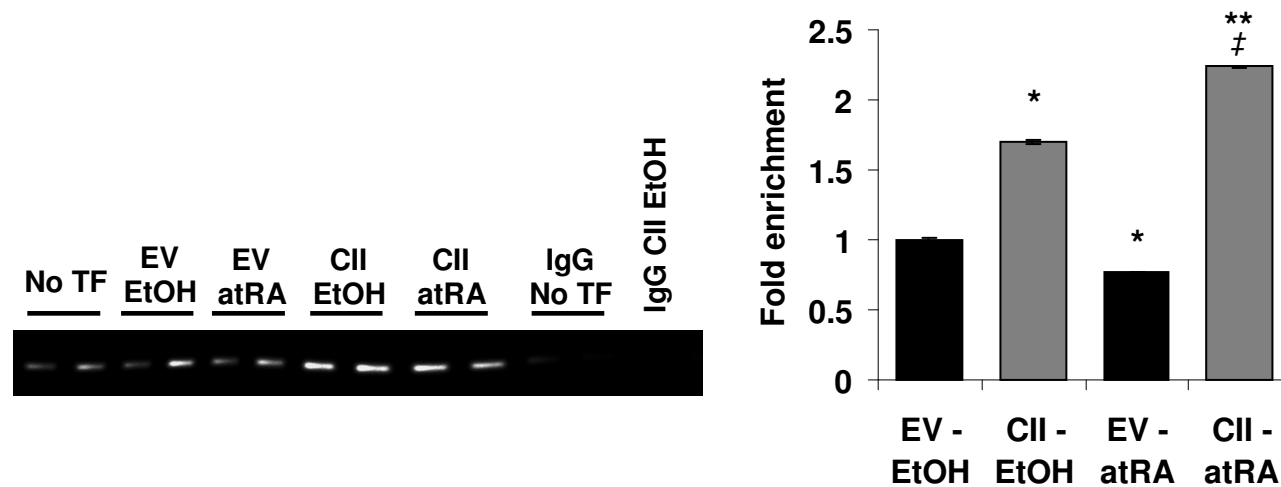

**Figure S5: CHIP of COUP-TFII-FLAG on the *RARB2* promoter in MCF-7 cells.** A, Chromatin immunoprecipitation was performed in MCF-7 cells transfected with pIRES-COUP-TFII-FLAG or empty vector, serum starved for 48 h, and treated with 1  $\mu$ M atRA for 1 h. Following Q-PCR using primers to the *RARB2* promoter as described in Materials and Methods, duplicate samples were run on a 2% agarose gel. B, Only EV – EtOH set to 1. atRA increased COUP-TFII-FLAG binding to the *RARB2* promoter 32%. Signific. different  $p < 0.05$ : \* to EV – EtOH, \*\* to EV – atRA, ‡ to CII – EtOH.
