# Supplementary material for: Identification and Characterization of Nucleolin as a COUP-TFII Coactivator of Retinoic Acid Receptor β Transcription in Breast Cancer Cells
Source: PLOS journal article supplement (doi:10.1371/journal.pone.0038278), 2012-05-31
Supplement: S7 (10.1371/journal.pone.0038278.s007) [file journal.pone.0038278.s007]

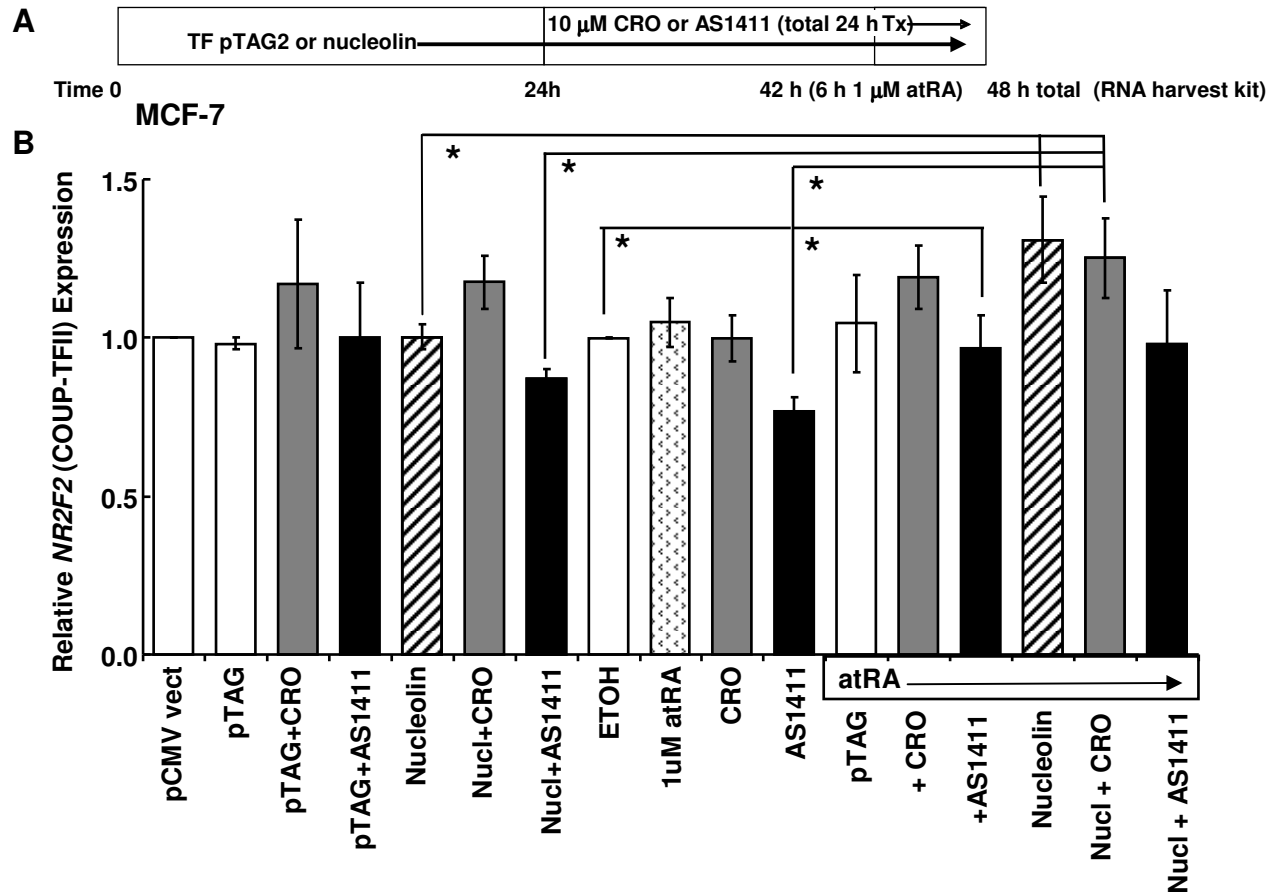

**Figure S7: Effect of cell treatments on *NR2F2* (COUP-TFII) expression in MCF-7 cells.** A, Schematic diagram of transfection and treatment of MCF-7 cells. MCF-7 cells were transfected with equal amounts of pTAG2 control vector or pCMV-nucleolin for 24 h., treated with 10 μM CRO or AS1411, as indicated for 24 h, and 1 μM atRA was added for the last 6 h. RNA was harvested and Q-PCR performed. B, *NR2F2* values were normalized to GAPDH. Values are the average of 6 separate experiments ± SEM. \* signific. different,  $p < 0.05$  in one way ANOVA followed by Bonferroni multiple comparison test. Note that there was no statistical difference between the pTAG+AS1411 versus Nucl+AS1411 or AS1411 sample measurements of *NR2F2*.
