# Supplementary material for: Identification and Characterization of Nucleolin as a COUP-TFII Coactivator of Retinoic Acid Receptor β Transcription in Breast Cancer Cells
Source: PLOS journal article supplement (doi:10.1371/journal.pone.0038278), 2012-05-31
Supplement: S8 (10.1371/journal.pone.0038278.s008) [file journal.pone.0038278.s008]

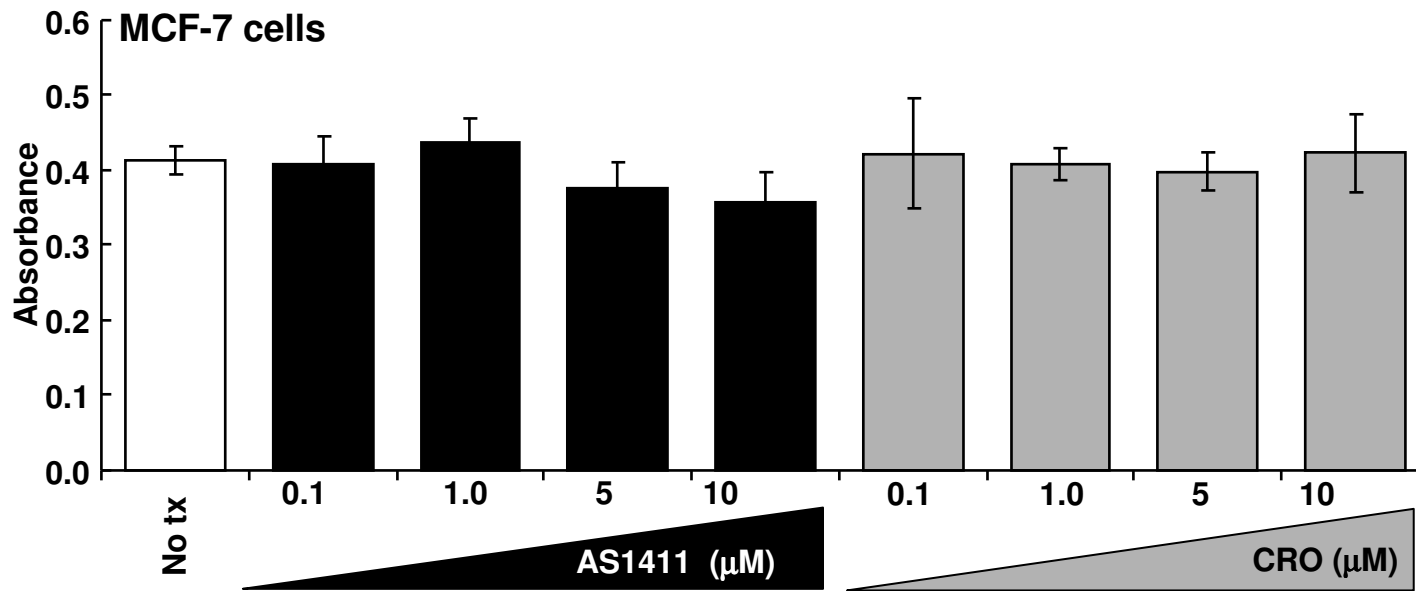

**Figure S8: Neither AS1411 nor CRO inhibit MCF-7 cell viability after 4 d.** MCF-7 cells were treated with the indicated concentrations of AS1411 or CRO and cell viability was measured by an MTT assay (A490nm, Promega CellTitre assay). Values are the average of 4 determinations  $\pm$  SEM.
