# Supplementary material for: Identification and Characterization of Nucleolin as a COUP-TFII Coactivator of Retinoic Acid Receptor β Transcription in Breast Cancer Cells
Source: PLOS journal article supplement (doi:10.1371/journal.pone.0038278), 2012-05-31
Supplement: S9 (10.1371/journal.pone.0038278.s009) [file journal.pone.0038278.s009]

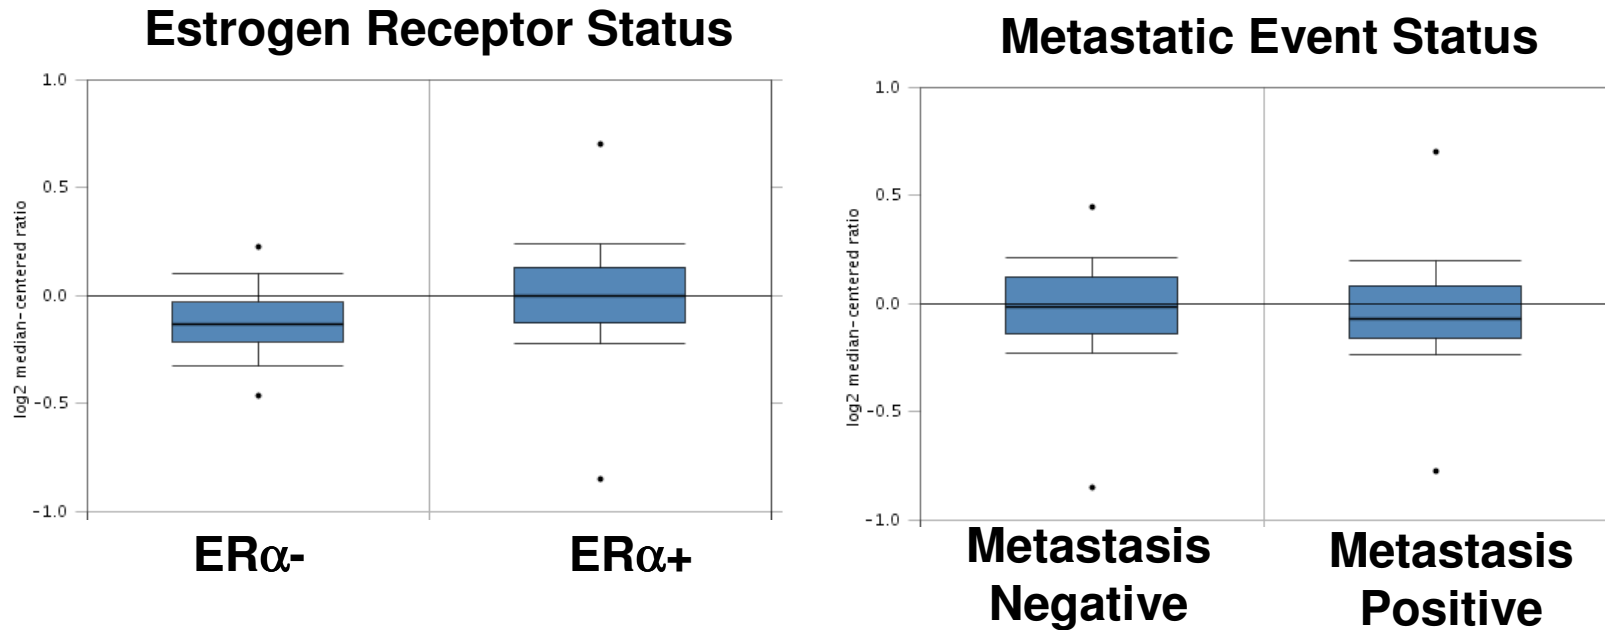

**Figure S9: Oncomine examination of *NR2F2* expression in breast tumors.** Data mining in Oncomine microarray data sets for *NR2F2* in breast cancer identified that: A, *NR2F2* expression is significantly higher in ERα+ breast tumors ( $p < 0.007$ ). B. *NR2F2* is significantly lower in metastatic breast tumors ( $p < 0.05$ ). Data are from (van de Vijver MJ, He YD, van't Veer LJ, et al. A gene-expression signature as a predictor of survival in breast cancer. N Engl J Med 2002; 347: 1999-2009).
